# Supplementary figures and images for: GRF2 Is Crucial for Cone Photoreceptor Viability and Ribbon Synapse Formation in the Mouse Retina
Source: MDPI journal article supplement (doi:10.3390/cells12212574), 2023-11-04

A

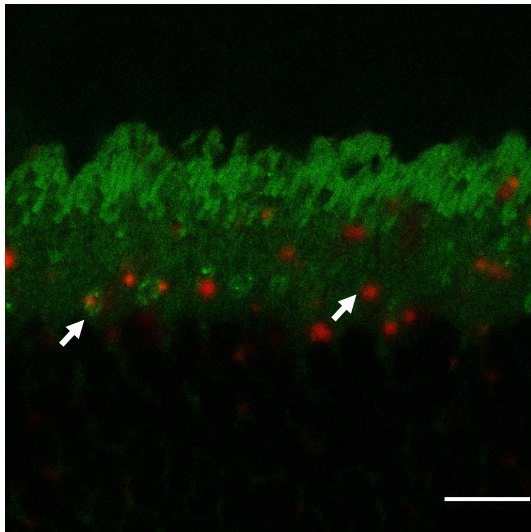

B

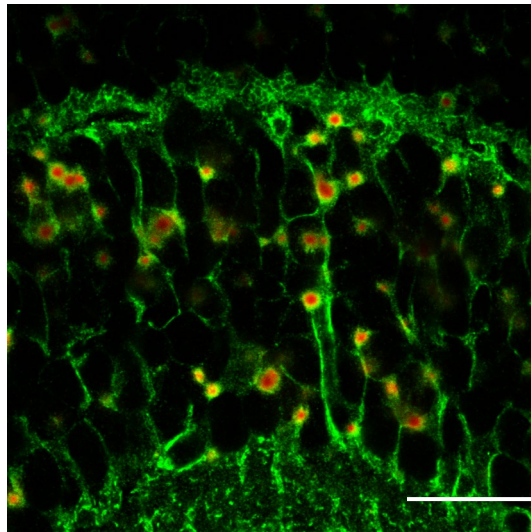

Supplement: s1 [file s1]
